# Supplementary material for: Science- and risk-based strategy to qualify prefillable autoclavable syringes as primary packaging material
Source: HighWire-hosted journal article supplement (doi:10.1136/ejhpharm-2020-002333), 2021-01-27
Supplement: ejhpharm-2020-002333supp006_data_supplement.pdf [file ejhpharm-2020-002333supp006_data_supplement.pdf]

**Supplemental table 4: Calculation silicon oil based on 0.25mg/cm<sup>2</sup> according to Ph. Eur. 3.2.8.**

| Volume (mL) | Height of the graduation (cm) | Intern surface (cm <sup>2</sup> ) | Upper limit of allowed silicon oil (mg/ syringe) | Max amount of Silicon per syringe (mg) at the worst case* measured | Max amount of Silicon per syringe (µg/L) at the worst case* measured |
|-------------|-------------------------------|-----------------------------------|--------------------------------------------------|--------------------------------------------------------------------|----------------------------------------------------------------------|
| 5           | 4.284                         | 16.41                             | 4.10                                             | 1.46                                                               | 292212                                                               |
| 50          | 9.031                         | 75.33                             | 18.83                                            | 6.71                                                               | 134166                                                               |

\* Based on:

|                                                                      |              |
|----------------------------------------------------------------------|--------------|
| Si <sub>3</sub>                                                      | 84.26 g/mol  |
| C <sub>8</sub> H <sub>24</sub> Si <sub>3</sub> O <sub>2</sub> (PDMS) | 236.53 g/mol |
| Factor                                                               | 2.8073       |
